# Supplementary material for: Sustainment of proactive physical therapy for individuals with early-stage Parkinson’s disease: a quality improvement study over 4 years
Source: PubMed Central journal article supplement (PMC8477476; doi:10.1186/s43058-021-00205-x), 2021-09-27
Supplement: 43058_2021_205_MOESM1_ESM.pdf [file 43058_2021_205_MOESM1_ESM.pdf]

**Additional file 1:** Initial and sustained implementation strategies, organized with the Expert Recommendations for Implementing Change (ERIC; Waltz et al 2019). Bolded sustainment strategies indicate those continued to present (2021).

| Implementation Strategy                                                                    | Initial Implementation Strategies (2015-2016)                                                                                                                                                                                 | Sustainment Strategies (2017-2019)                                                                                                                                                                                                                                                                                          |
|--------------------------------------------------------------------------------------------|-------------------------------------------------------------------------------------------------------------------------------------------------------------------------------------------------------------------------------|-----------------------------------------------------------------------------------------------------------------------------------------------------------------------------------------------------------------------------------------------------------------------------------------------------------------------------|
| ERIC Cluster 1: Use evaluative and iterative strategies                                    | <b>Assess for readiness and identify barriers and facilitators</b>                                                                                                                                                            |                                                                                                                                                                                                                                                                                                                             |
|                                                                                            | <ul style="list-style-type: none"> <li>• Small group of stakeholders informally discussed their views</li> </ul>                                                                                                              | <ul style="list-style-type: none"> <li>• Stakeholder meetings with entire clinical team at one site and interview off-site champions and managers</li> <li>• Periodic assessment in monthly meetings with champions</li> <li>• <b>Plan to continue gathering input from PDMD clinical champion meetings.</b></li> </ul>     |
|                                                                                            | <b>Audit and provide feedback</b>                                                                                                                                                                                             |                                                                                                                                                                                                                                                                                                                             |
|                                                                                            | <ul style="list-style-type: none"> <li>• Two therapists compared performance</li> </ul>                                                                                                                                       | <ul style="list-style-type: none"> <li>• Provide one page document of feedback after initial three sessions with participant within 3-5 days.</li> <li>• <b>Champions to perform three audits/year.</b></li> </ul>                                                                                                          |
|                                                                                            | <b>Purposefully reexamine the implementation</b>                                                                                                                                                                              |                                                                                                                                                                                                                                                                                                                             |
|                                                                                            | <ul style="list-style-type: none"> <li>• Informally with communication between two therapists</li> </ul>                                                                                                                      | <ul style="list-style-type: none"> <li>• <b>Facilitator &amp;/or program manager attend to feedback at champion meetings allowed for dynamic changes while maintaining the fidelity of the program.</b></li> <li>• <b>Utilization of Sustainability Assessment Tools with stakeholders to assess the program</b></li> </ul> |
|                                                                                            | <b>Develop implement tools for quality monitoring</b>                                                                                                                                                                         |                                                                                                                                                                                                                                                                                                                             |
|                                                                                            | <ul style="list-style-type: none"> <li>• Two therapists compared documentation of physical activity</li> <li>• PAPT user survey</li> <li>• Clinical outcomes manually reviewed</li> </ul>                                     | <ul style="list-style-type: none"> <li>• PAPT user survey repeated</li> <li>• <b>Clinical outcomes manually reviewed</b></li> <li>• <b>Development of documentation for PA for easy clinician review .</b></li> </ul>                                                                                                       |
|                                                                                            | <b>Develop and organize quality monitoring systems</b>                                                                                                                                                                        |                                                                                                                                                                                                                                                                                                                             |
|                                                                                            | <ul style="list-style-type: none"> <li>• Two therapists develop survey for PAPT users</li> </ul>                                                                                                                              | <ul style="list-style-type: none"> <li>• Survey updated for PAPT users by clinicians</li> <li>• <b>Program managers plans to use organizational survey data</b></li> </ul>                                                                                                                                                  |
| <b>Develop a formal implementation blueprint</b>                                           |                                                                                                                                                                                                                               |                                                                                                                                                                                                                                                                                                                             |
| <ul style="list-style-type: none"> <li>• Care path developed</li> </ul>                    | <ul style="list-style-type: none"> <li>• Continued care path</li> <li>• Grid created to aid in scaling to other disciplines &amp; in the development of PAPT at additional sites.</li> </ul>                                  |                                                                                                                                                                                                                                                                                                                             |
| <b>Conduct local need assessment</b>                                                       |                                                                                                                                                                                                                               |                                                                                                                                                                                                                                                                                                                             |
| <ul style="list-style-type: none"> <li>• Informal discussions with stakeholders</li> </ul> | <ul style="list-style-type: none"> <li>• Focus group, interviews with stakeholders.</li> <li>• <b>Multiple stakeholder groups meet regularly, some institutional processes already in place (e.g. regular PDMD</b></li> </ul> |                                                                                                                                                                                                                                                                                                                             |

|                                                         |                                                                                                                         |                                                                                                                                                                                                                                                                                                                                                                |
|---------------------------------------------------------|-------------------------------------------------------------------------------------------------------------------------|----------------------------------------------------------------------------------------------------------------------------------------------------------------------------------------------------------------------------------------------------------------------------------------------------------------------------------------------------------------|
| (continued)                                             |                                                                                                                         | <b>champions meet, leadership meetings meetings)</b>                                                                                                                                                                                                                                                                                                           |
| ERIC Cluster 1: Use evaluative and iterative strategies | Obtain and use patients/consumers and family feedback.                                                                  |                                                                                                                                                                                                                                                                                                                                                                |
|                                                         | <ul style="list-style-type: none"> <li>• Interview performed with Year 1 PAPT users</li> </ul>                          | <ul style="list-style-type: none"> <li>• Interviews performed with those PAPT users seen during Year 3</li> </ul>                                                                                                                                                                                                                                              |
| ERIC Category 2: Provide interactive assistance         | Facilitation                                                                                                            |                                                                                                                                                                                                                                                                                                                                                                |
|                                                         | <ul style="list-style-type: none"> <li>• Two therapists worked together</li> </ul>                                      | <ul style="list-style-type: none"> <li>• Formal facilitator role created</li> <li>• Program manager to continue to engage this population, work with champions</li> </ul>                                                                                                                                                                                      |
|                                                         | Provide Local Technical Assistance                                                                                      |                                                                                                                                                                                                                                                                                                                                                                |
|                                                         | <ul style="list-style-type: none"> <li>• Informal</li> </ul>                                                            | <ul style="list-style-type: none"> <li>• Informal</li> </ul>                                                                                                                                                                                                                                                                                                   |
|                                                         | Provide Clinical Supervision                                                                                            |                                                                                                                                                                                                                                                                                                                                                                |
|                                                         | <ul style="list-style-type: none"> <li>• Limited supervision, mostly self- review</li> </ul>                            | <ul style="list-style-type: none"> <li>• Chart audit on first three sessions</li> <li>• Periodic review or support when requested</li> <li>• <b>Institutional mentorship programs to support clinicians</b></li> </ul>                                                                                                                                         |
|                                                         | Centralize Technical Assistance                                                                                         |                                                                                                                                                                                                                                                                                                                                                                |
|                                                         | <ul style="list-style-type: none"> <li>• Informal</li> </ul>                                                            | <ul style="list-style-type: none"> <li>• Informal</li> </ul>                                                                                                                                                                                                                                                                                                   |
| ERIC Cluster 3: Adapt and tailor to context             | Tailor strategies                                                                                                       |                                                                                                                                                                                                                                                                                                                                                                |
|                                                         | <ul style="list-style-type: none"> <li>• Strategies tailored to some stakeholders</li> </ul>                            | <ul style="list-style-type: none"> <li>• Tailor strategies to multiple stakeholders, multiple sites with input from a variety of stakeholders</li> <li>• Strategies to be updated by champions with input from program manager as needed.</li> </ul>                                                                                                           |
|                                                         | Promote adaptability                                                                                                    |                                                                                                                                                                                                                                                                                                                                                                |
|                                                         | <ul style="list-style-type: none"> <li>• With only two therapists, change could be discussed and implemented</li> </ul> | <ul style="list-style-type: none"> <li>• Feedback taken with initial interviews, monthly meetings.</li> <li>• Regular communication allowed for a flexible time table based on clinic volumes</li> <li>• Utilized electronically shared resources</li> <li>• Review of patient outcomes, quality improvement interviews aid in process improvement.</li> </ul> |
|                                                         | Use data experts                                                                                                        |                                                                                                                                                                                                                                                                                                                                                                |
|                                                         | <ul style="list-style-type: none"> <li>• Knowledge broker</li> </ul>                                                    | <ul style="list-style-type: none"> <li>• Knowledge broker</li> </ul>                                                                                                                                                                                                                                                                                           |
| ERIC Cluster 4: Develop stakeholder interrelationships  | Identify and prepare champions                                                                                          |                                                                                                                                                                                                                                                                                                                                                                |
|                                                         | <ul style="list-style-type: none"> <li>• Managers identified therapist</li> </ul>                                       | <ul style="list-style-type: none"> <li>• <b>Leadership identify champions</b></li> </ul>                                                                                                                                                                                                                                                                       |
|                                                         | Organize clinician implementation team meetings                                                                         |                                                                                                                                                                                                                                                                                                                                                                |
|                                                         | <ul style="list-style-type: none"> <li>• Informal</li> </ul>                                                            | <ul style="list-style-type: none"> <li>• Monthly meetings set</li> <li>• <b>Champion meetings</b></li> </ul>                                                                                                                                                                                                                                                   |
|                                                         | Recruit, designate, and train for leadership                                                                            |                                                                                                                                                                                                                                                                                                                                                                |
|                                                         | <ul style="list-style-type: none"> <li>• One PT identified by lead researcher &amp; manager</li> </ul>                  | <ul style="list-style-type: none"> <li>• Team of three attend Knowledge Translation summit, other attend PD-related course</li> <li>• <b>Plans champion orientation, webinars, and journal club participation.</b></li> </ul>                                                                                                                                  |
|                                                         | Inform local opinion leaders                                                                                            |                                                                                                                                                                                                                                                                                                                                                                |

|                                                                                                                   |                                                                                                                                                                                     |                                                                                                                                                                                                                                               |
|-------------------------------------------------------------------------------------------------------------------|-------------------------------------------------------------------------------------------------------------------------------------------------------------------------------------|-----------------------------------------------------------------------------------------------------------------------------------------------------------------------------------------------------------------------------------------------|
| (continued)<br>ERIC Cluster 4:<br>Develop<br>stakeholder<br>interrelationships                                    | <ul style="list-style-type: none"> <li>Interviews with key referrers, OP manager, therapist</li> </ul>                                                                              | <ul style="list-style-type: none"> <li>Interviews/focus groups before implementation, intermittent updates to team</li> <li><b>PAPT updates included in physician leader's monthly updates.</b></li> </ul>                                    |
|                                                                                                                   | Build a coalition                                                                                                                                                                   |                                                                                                                                                                                                                                               |
|                                                                                                                   | <ul style="list-style-type: none"> <li>Attended meetings with referrers</li> </ul>                                                                                                  | <ul style="list-style-type: none"> <li>Engaged stakeholders of the entire OP team</li> <li><b>Network of champions at each site, engaged with leadership.</b></li> </ul>                                                                      |
|                                                                                                                   | Obtain formal commitments                                                                                                                                                           |                                                                                                                                                                                                                                               |
|                                                                                                                   | <ul style="list-style-type: none"> <li>Not applied</li> </ul>                                                                                                                       | <ul style="list-style-type: none"> <li><b>Champion role commitment</b></li> </ul>                                                                                                                                                             |
|                                                                                                                   | Identify early adopters                                                                                                                                                             |                                                                                                                                                                                                                                               |
|                                                                                                                   | <ul style="list-style-type: none"> <li>Manager identified one staff</li> </ul>                                                                                                      | <ul style="list-style-type: none"> <li><b>Managers and implementation identified champions</b></li> <li><b>Champions worked with managers to identify other therapists to be trained</b></li> </ul>                                           |
|                                                                                                                   | Conduct local consensus discussions                                                                                                                                                 |                                                                                                                                                                                                                                               |
|                                                                                                                   | <ul style="list-style-type: none"> <li>Discussions with referrers at collaborative meetings</li> </ul>                                                                              | <ul style="list-style-type: none"> <li>Focus groups with therapists, managers</li> <li>Quality Improvement interviews with PAPT users</li> <li><b>Monthly meetings with champions</b></li> </ul>                                              |
|                                                                                                                   | Capture and share local knowledge                                                                                                                                                   |                                                                                                                                                                                                                                               |
|                                                                                                                   | <ul style="list-style-type: none"> <li>Not applied</li> </ul>                                                                                                                       | <ul style="list-style-type: none"> <li><b>Champions provide insight and contributions.</b></li> </ul>                                                                                                                                         |
|                                                                                                                   | Use an implementation advisor                                                                                                                                                       |                                                                                                                                                                                                                                               |
|                                                                                                                   | <ul style="list-style-type: none"> <li>Knowledge broker involved.</li> </ul>                                                                                                        | <ul style="list-style-type: none"> <li>Knowledge broker facilitates team attendance to Knowledge Translation Summit</li> <li>Support from knowledge translation mentors</li> </ul>                                                            |
| Visit other sites                                                                                                 |                                                                                                                                                                                     |                                                                                                                                                                                                                                               |
| <ul style="list-style-type: none"> <li>Not applied</li> </ul>                                                     | <ul style="list-style-type: none"> <li>Planned, but not accomplished by our immediate team.</li> <li><b>PD program manager visits to assess &amp; support settings.</b></li> </ul>  |                                                                                                                                                                                                                                               |
| Develop an implementation glossary                                                                                |                                                                                                                                                                                     |                                                                                                                                                                                                                                               |
| <ul style="list-style-type: none"> <li>Not applied</li> </ul>                                                     | <ul style="list-style-type: none"> <li>Informal, general protocol developed</li> <li>Dissemination toolbox</li> </ul>                                                               |                                                                                                                                                                                                                                               |
| Develop academic partnerships                                                                                     |                                                                                                                                                                                     |                                                                                                                                                                                                                                               |
| <ul style="list-style-type: none"> <li>Researcher from academic center collaborates with clinical team</li> </ul> | <ul style="list-style-type: none"> <li><b>Collaboration with research &amp; clinical team</b></li> <li><b>Team engaged with organization internal staff development.</b></li> </ul> |                                                                                                                                                                                                                                               |
| ERIC Cluster 5:<br>Train and evaluate<br>stakeholders                                                             | Train and educate stakeholders                                                                                                                                                      |                                                                                                                                                                                                                                               |
|                                                                                                                   | <ul style="list-style-type: none"> <li>Referral development: Targeted academic medical center neurologists</li> </ul>                                                               | <ul style="list-style-type: none"> <li>Referral Development: Developed new materials to target community neurologists</li> <li><b>Share materials and highlight key statements for marketing material in dissemination toolbox</b></li> </ul> |
|                                                                                                                   | Provide ongoing consultation                                                                                                                                                        |                                                                                                                                                                                                                                               |

|                                                                                 |                                                                                                                                                                                     |                                                                                                                                                                                                                                                                                               |
|---------------------------------------------------------------------------------|-------------------------------------------------------------------------------------------------------------------------------------------------------------------------------------|-----------------------------------------------------------------------------------------------------------------------------------------------------------------------------------------------------------------------------------------------------------------------------------------------|
| (continued)<br>ERIC Cluster 5:<br>Train and evaluate<br>stakeholders            | <ul style="list-style-type: none"> <li>Two therapists discussed regularly</li> </ul>                                                                                                | <ul style="list-style-type: none"> <li>Knowledge broker, facilitator available for questions, attended meetings regularly</li> <li><b>Champions meet regularly</b></li> <li><b>Access to mentoring</b></li> </ul>                                                                             |
|                                                                                 | Develop educational materials                                                                                                                                                       |                                                                                                                                                                                                                                                                                               |
|                                                                                 | <ul style="list-style-type: none"> <li>Materials for PAPT Users: Shared decision making handout</li> <li>Materials for therapists: evaluation plan for therapist</li> </ul>         | <ul style="list-style-type: none"> <li><b>Materials for PAPT Users: shared decision making handout (updated every two years), progression handouts</b></li> <li>Material for therapists: presentation, <b>training resources, webinar for therapist</b></li> </ul>                            |
|                                                                                 | Make training dynamic                                                                                                                                                               |                                                                                                                                                                                                                                                                                               |
|                                                                                 | <ul style="list-style-type: none"> <li>One co-treatment session</li> </ul>                                                                                                          | <ul style="list-style-type: none"> <li><b>Presentation converted to webinar</b></li> <li>Shadowing</li> <li>Questions for therapists</li> </ul>                                                                                                                                               |
|                                                                                 | Distribute educational materials                                                                                                                                                    |                                                                                                                                                                                                                                                                                               |
|                                                                                 | <ul style="list-style-type: none"> <li>Two therapists shared materials</li> </ul>                                                                                                   | <ul style="list-style-type: none"> <li>Shared folder</li> <li>Tool box with important materials</li> </ul>                                                                                                                                                                                    |
|                                                                                 | Use train-the-trainer strategies                                                                                                                                                    |                                                                                                                                                                                                                                                                                               |
|                                                                                 | <ul style="list-style-type: none"> <li>Two therapists collaborated</li> </ul>                                                                                                       | <ul style="list-style-type: none"> <li><b>Trained champions train other staff at home site</b></li> </ul>                                                                                                                                                                                     |
|                                                                                 | Conduct educational meetings                                                                                                                                                        |                                                                                                                                                                                                                                                                                               |
|                                                                                 | <ul style="list-style-type: none"> <li>Informal</li> </ul>                                                                                                                          | <ul style="list-style-type: none"> <li>Monthly PAPT meetings</li> <li>Planned champion meetings</li> </ul>                                                                                                                                                                                    |
|                                                                                 | Conduct educational outreach visits                                                                                                                                                 |                                                                                                                                                                                                                                                                                               |
|                                                                                 | <ul style="list-style-type: none"> <li>Not applied</li> </ul>                                                                                                                       | <ul style="list-style-type: none"> <li><b>Presentations at affiliate hospital</b></li> </ul>                                                                                                                                                                                                  |
| Shadow other experts                                                            |                                                                                                                                                                                     |                                                                                                                                                                                                                                                                                               |
| <ul style="list-style-type: none"> <li>Two therapists co-treat</li> </ul>       | <ul style="list-style-type: none"> <li>Shadowing is part of the training</li> <li>Plan to continue to shadow with training, happening with OT &amp; SLP teams</li> </ul>            |                                                                                                                                                                                                                                                                                               |
| Work with educational institutions                                              |                                                                                                                                                                                     |                                                                                                                                                                                                                                                                                               |
| <ul style="list-style-type: none"> <li>Affiliate medical center team</li> </ul> | <ul style="list-style-type: none"> <li>Knowledge Translation Summit</li> <li>Internal staff development, clinical programs at organization and affiliate medical center.</li> </ul> |                                                                                                                                                                                                                                                                                               |
| ERIC Cluster 6:<br>Support Clinicians                                           | Facilitate relay of clinical data to providers                                                                                                                                      |                                                                                                                                                                                                                                                                                               |
|                                                                                 | <ul style="list-style-type: none"> <li>Clinicians assisted with quality improvement data collection</li> </ul>                                                                      | <ul style="list-style-type: none"> <li>Clinician champions worked on implementation materials, monthly meetings provided opportunity for information, clinicians presented data at national conference platform and poster</li> <li><b>Champions and leaders will now do this.</b></li> </ul> |
|                                                                                 | Remind clinicians                                                                                                                                                                   |                                                                                                                                                                                                                                                                                               |
|                                                                                 | <ul style="list-style-type: none"> <li>Informal</li> </ul>                                                                                                                          | <ul style="list-style-type: none"> <li><b>Monthly meetings provided an opportunity for champion discussion and reminders.</b></li> </ul>                                                                                                                                                      |
| Develop resource sharing agreements                                             |                                                                                                                                                                                     |                                                                                                                                                                                                                                                                                               |

|                                                      |                                                                                                                                    |                                                                                                                                                                                                                                       |
|------------------------------------------------------|------------------------------------------------------------------------------------------------------------------------------------|---------------------------------------------------------------------------------------------------------------------------------------------------------------------------------------------------------------------------------------|
| (continued)<br>ERIC Cluster 6:<br>Support Clinicians | <ul style="list-style-type: none"> <li>• Not applied</li> </ul>                                                                    | <ul style="list-style-type: none"> <li>• Staff collaborated on resources (no formal agreements)</li> </ul>                                                                                                                            |
|                                                      | Revise professional roles                                                                                                          |                                                                                                                                                                                                                                       |
|                                                      | <ul style="list-style-type: none"> <li>• Not applied</li> </ul>                                                                    | <ul style="list-style-type: none"> <li>• Manager role developed by the organization who acted as an advocate for the program.</li> </ul>                                                                                              |
| ERIC Cluster 7:<br>Engage consumers                  | Create new clinical teams                                                                                                          |                                                                                                                                                                                                                                       |
|                                                      | <ul style="list-style-type: none"> <li>• Not applied</li> </ul>                                                                    | <ul style="list-style-type: none"> <li>• <b>Champion team</b>, clinical teams</li> </ul>                                                                                                                                              |
|                                                      | Involve patients/consumers and family members                                                                                      |                                                                                                                                                                                                                                       |
|                                                      | <ul style="list-style-type: none"> <li>• Interviewed 2016 attendees for feedback</li> </ul>                                        | <ul style="list-style-type: none"> <li>• Interviewed 2018 PAPT users and shared quality improvement feedback with clinicians</li> <li>• <b>Informal reflections from trained clinicians at monthly meetings.</b></li> </ul>           |
|                                                      | Intervene with patients/consumers to enhance uptake and adherence                                                                  |                                                                                                                                                                                                                                       |
|                                                      | <ul style="list-style-type: none"> <li>• Evaluations &amp; relationship with patients/consumers foster better adherence</li> </ul> | <ul style="list-style-type: none"> <li>• <b>Evaluations &amp; relationship with patients/consumers</b></li> </ul>                                                                                                                     |
|                                                      | Prepare patients/consumers to be active participants                                                                               |                                                                                                                                                                                                                                       |
|                                                      | <ul style="list-style-type: none"> <li>• Strong relationship</li> </ul>                                                            | <ul style="list-style-type: none"> <li>• <b>Strong relationship</b></li> </ul>                                                                                                                                                        |
| ERIC Cluster 8:<br>Utilize Financial Structures      | Increased demand                                                                                                                   |                                                                                                                                                                                                                                       |
|                                                      | <ul style="list-style-type: none"> <li>• Educate referrers</li> </ul>                                                              | <ul style="list-style-type: none"> <li>• Marketing resources for individuals with PD, external referrers</li> </ul>                                                                                                                   |
|                                                      | Fund and contract for the clinical innovation                                                                                      |                                                                                                                                                                                                                                       |
|                                                      | <ul style="list-style-type: none"> <li>• Internal department funds</li> <li>• Parkinson's Foundation Grant</li> </ul>              | <ul style="list-style-type: none"> <li>• Grant funding through Academy of Neurologic Physical Therapy.</li> <li>• General clinic specific organizational funds</li> <li>• Marketing department</li> <li>• Internal Academy</li> </ul> |
|                                                      | Access new funding                                                                                                                 |                                                                                                                                                                                                                                       |
| ERIC Cluster 9:<br>Change Infrastructure             | <ul style="list-style-type: none"> <li>• Parkinson's Foundation Grant</li> </ul>                                                   | <ul style="list-style-type: none"> <li>• Knowledge Translation Summit Grant</li> </ul>                                                                                                                                                |
|                                                      | Mandate change                                                                                                                     |                                                                                                                                                                                                                                       |
|                                                      | <ul style="list-style-type: none"> <li>• Not applied</li> </ul>                                                                    | <ul style="list-style-type: none"> <li>• Applied with support from organizational leaders</li> </ul>                                                                                                                                  |
|                                                      | Change record systems                                                                                                              |                                                                                                                                                                                                                                       |
|                                                      | <ul style="list-style-type: none"> <li>• Not applied</li> </ul>                                                                    | <ul style="list-style-type: none"> <li>• <b>Outcome Measure added: Mini-BESTest</b></li> <li>• In process: Physical Activity</li> </ul>                                                                                               |
| ERIC Cluster 9:<br>Change Infrastructure             | Change service sites                                                                                                               |                                                                                                                                                                                                                                       |
|                                                      | <ul style="list-style-type: none"> <li>• Not applied</li> </ul>                                                                    | <ul style="list-style-type: none"> <li>• Three additional locations added to increase reach</li> </ul>                                                                                                                                |

\*PDMD: Parkinson's disease and Movement Disorders, PAPT: ProActive Physical Therapy, Parkinson's disease (PD)
